# Supplementary material
Source: publisher site journal article supplement (https://www.dovepress.com/article/298977)
Supplement: Supplementary file 1 [file get_supplementary_file.php]

**Supplementary materials**

**Table S1. Results of the GSEA**

| **Pathway** | **ES** | **NOM-P-VAL** | **FDR** |
| --- | --- | --- | --- |
| Wnt signaling pathway | 0.43 | ＜0.05 | ＞0.25 |
| Ubiquitin-mediated proteolysis | 0.54 | ＜0.05 | ＞0.25 |
| Cell cycle | -0.51 | ＜0.05 | ＞0.25 |
| RNA polymerase | -0.53 | ＜0.05 | ＞0.25 |
| Pyrimidine metabolism | -0.49 | ＜0.05 | ＞0.25 |
| Notch signaling pathway | -0.51 | ＜0.05 | ＞0.25 |

ES, enrichment score; FDR, false discovery rate; GSEA, gene set enrichment analysis; NOM-P-VAL, nominal p value

**Supplementary Figure**


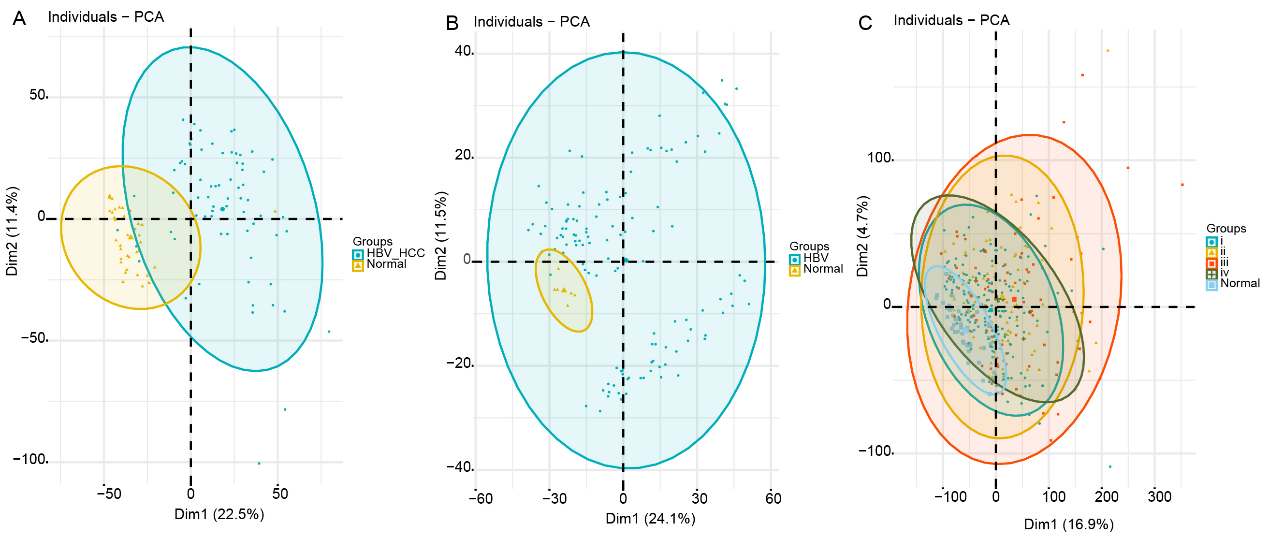


**Figure S1** PCA of (A) HBV, (B) HCC, and (C) HBV-associated HCC. PCA: Principal component analysis; HBV: hepatitis B virus; HCC: hepatocellular carcinoma.


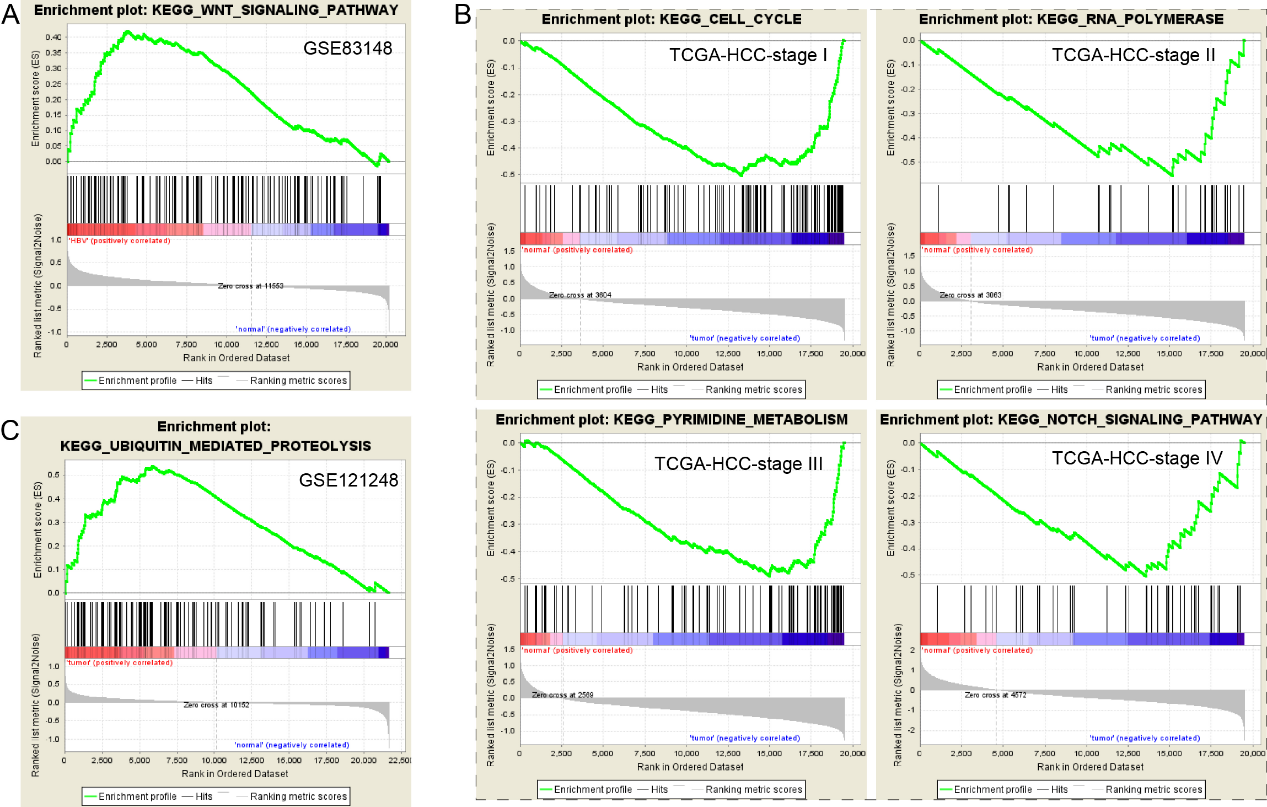


**Figure S2** Signaling pathways associated with genes differentially expressed in patients with HBV or HCC or both. KEGG analysis was performed on differentially expressed genes. (A) HBV was significantly associated with the Wnt signaling pathway. (B) Stage I HCC was associated with alterations in genes involved in the cell cycle; stage II HCC, with alterations in genes related to RNA polymerase; stage III HCC, with alterations in genes related to pyrimidine metabolism; and stage IV HCC, with alterations in genes related to Notch signaling. (C) HBV-associated HCC was associated with ubiquitin-mediated proteolysis.
